# Supplementary material for: Impact of multiple quaternary ammonium salts on dynamic properties of BSA adsorption layer at different pH values
Source: Royal Society of Chemistry journal article supplement (doi:10.1039/c7sm01607g), 2017-01-01
Supplement: c7sm01607g1.pdf [file c7sm01607g1.pdf]

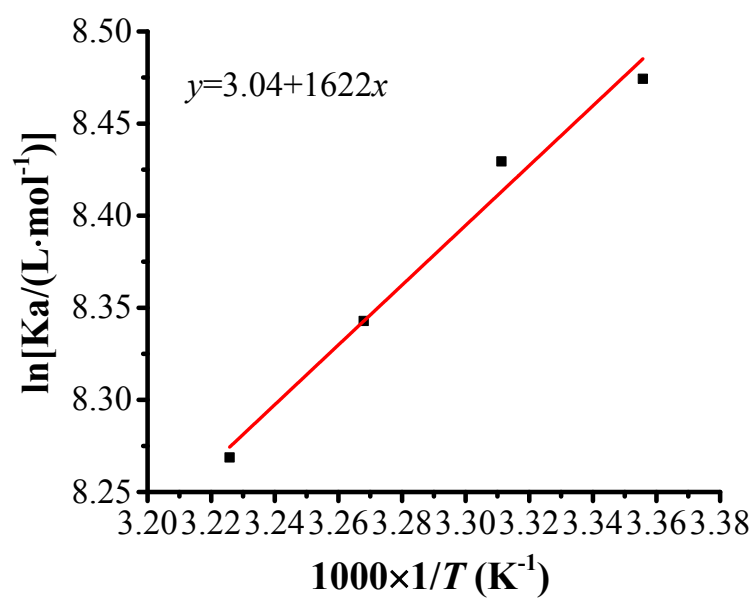

Figure S1. The plot of  $\ln K$  versus  $1/T$  for the MQAS/BSA mixtures.

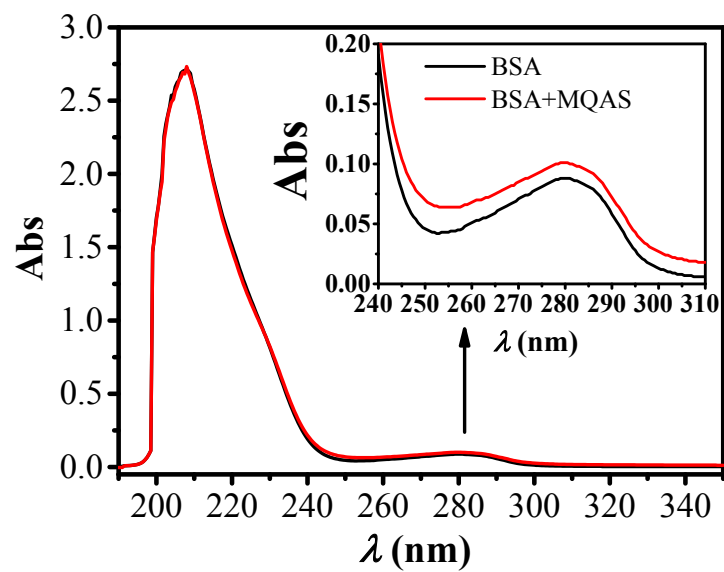

Figure S2. UV-vis absorption spectra of BSA and MQAS/BSA mixtures,  $[BSA]=2\times 10^{-6} \text{ mol}\cdot\text{L}^{-1}$ ,  $[MQAS]=2\times 10^{-5} \text{ mol}\cdot\text{L}^{-1}$ .
